# Supplementary material for: Recyclable and superior selective CO2 adsorption of C4B32 and Ca@C4B32: a new category of perfect cubic heteroborospherenes
Source: Royal Society of Chemistry journal article supplement (doi:10.1039/c9cp02380a), 2019-01-01
Supplement: c9cp02380a1.pdf [file c9cp02380a1.pdf]

## Supporting Information

### **Recyclable and superior selective CO<sub>2</sub> adsorption of C<sub>4</sub>B<sub>32</sub> and Ca@C<sub>4</sub>B<sub>32</sub>: A new category of perfect cubic heteroborosphenes**

Hui Bai,<sup>a, d\*</sup> Mengmeng Ma,<sup>a</sup> Jianping Zuo,<sup>b, c\*</sup> Qian-Fan Zhang,<sup>d</sup> Bing Bai,<sup>a, d</sup> Haojie Cao,<sup>a</sup> Wei  
Huang<sup>a\*</sup>

<sup>a</sup> *Key Laboratory of Coal Science and Technology of Ministry of Education and Shanxi Province,  
Taiyuan University of Technology, Taiyuan 030024, Shanxi, China*

<sup>b</sup> *School of Mechanics and Civil Engineering, China University of Mining and Technology, Beijing  
100083, China*

<sup>c</sup> *State Key Laboratory of Coal Resources and Safe Mining, China University of Mining and  
Technology, Beijing 100083, China*

<sup>d</sup> *Department of Chemistry, Brown University, 324 Brook St Box H, Providence, Rhode Island  
02912, USA*

*Email address: baihui@tyut.edu.cn; zjp@cumtb.edu.cn; huangwei@tyut.edu.cn*

**Fig. S1** Low-lying isomers of C-doped heteroborospherene  $C_4B_{32}$  with the relative energy less than 1.00 eV.

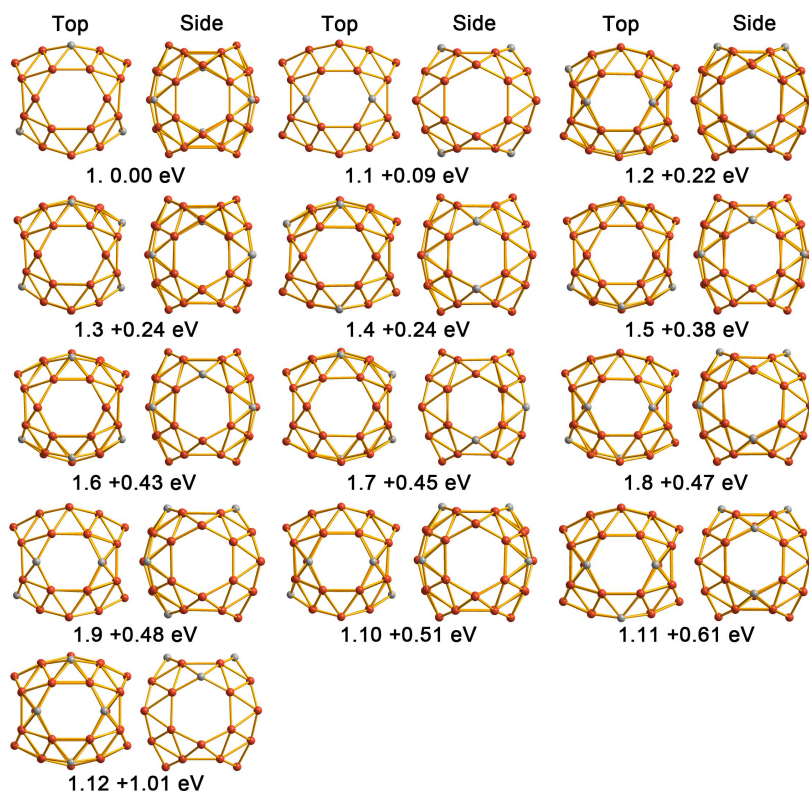

**Fig. S2**  $\pi$ -CMOs of  $C_{2v}$   $C_4B_{32}$ .

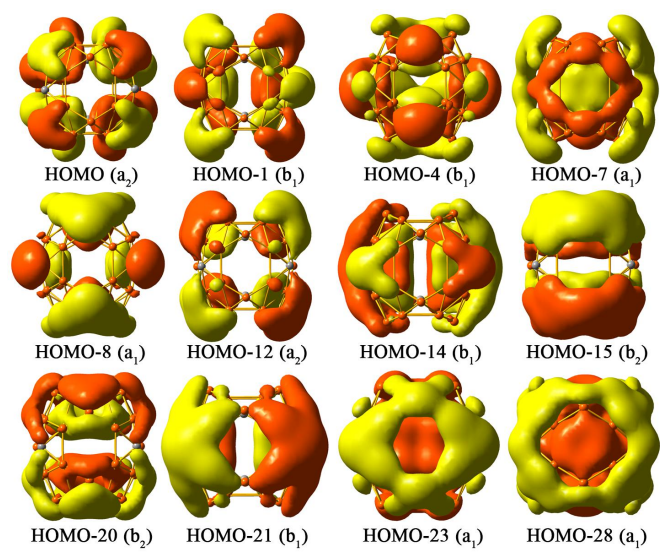

**Fig. S3** Low-lying isomers of CO<sub>2</sub>&C<sub>4</sub>B<sub>32</sub> with the relative energy indicated in eV.

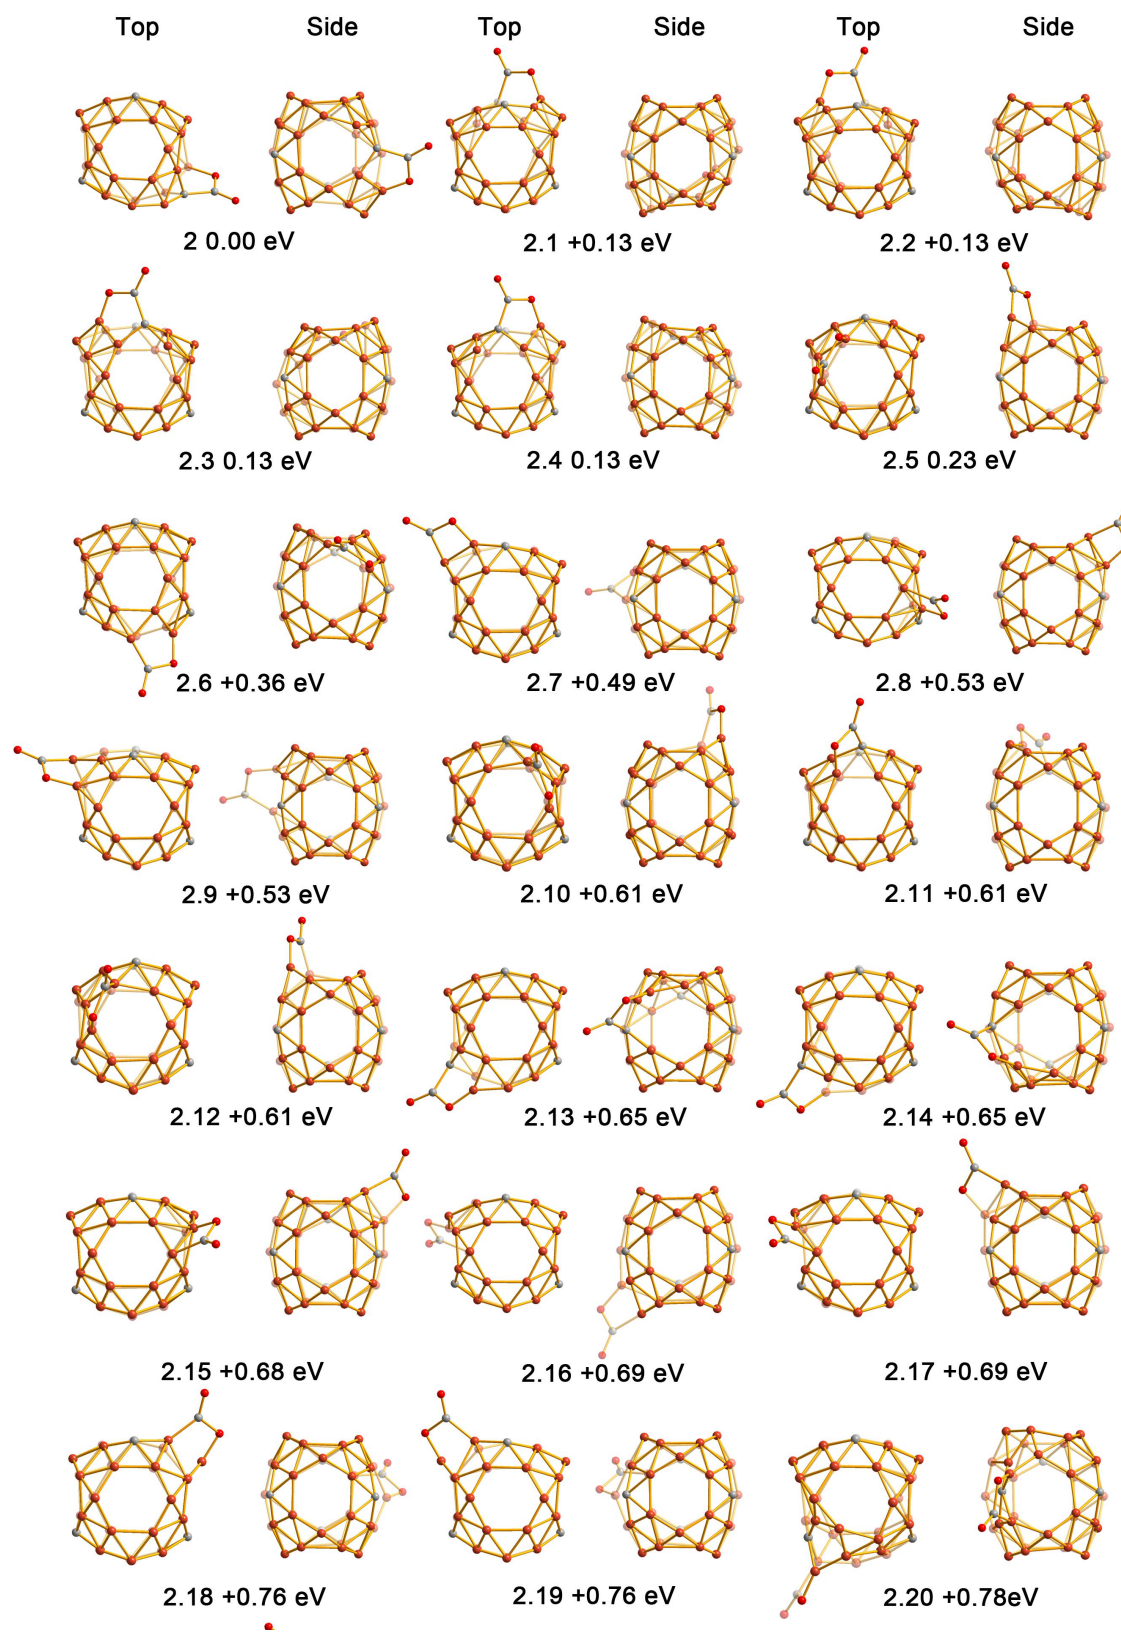

(Fig. S3 Continued)

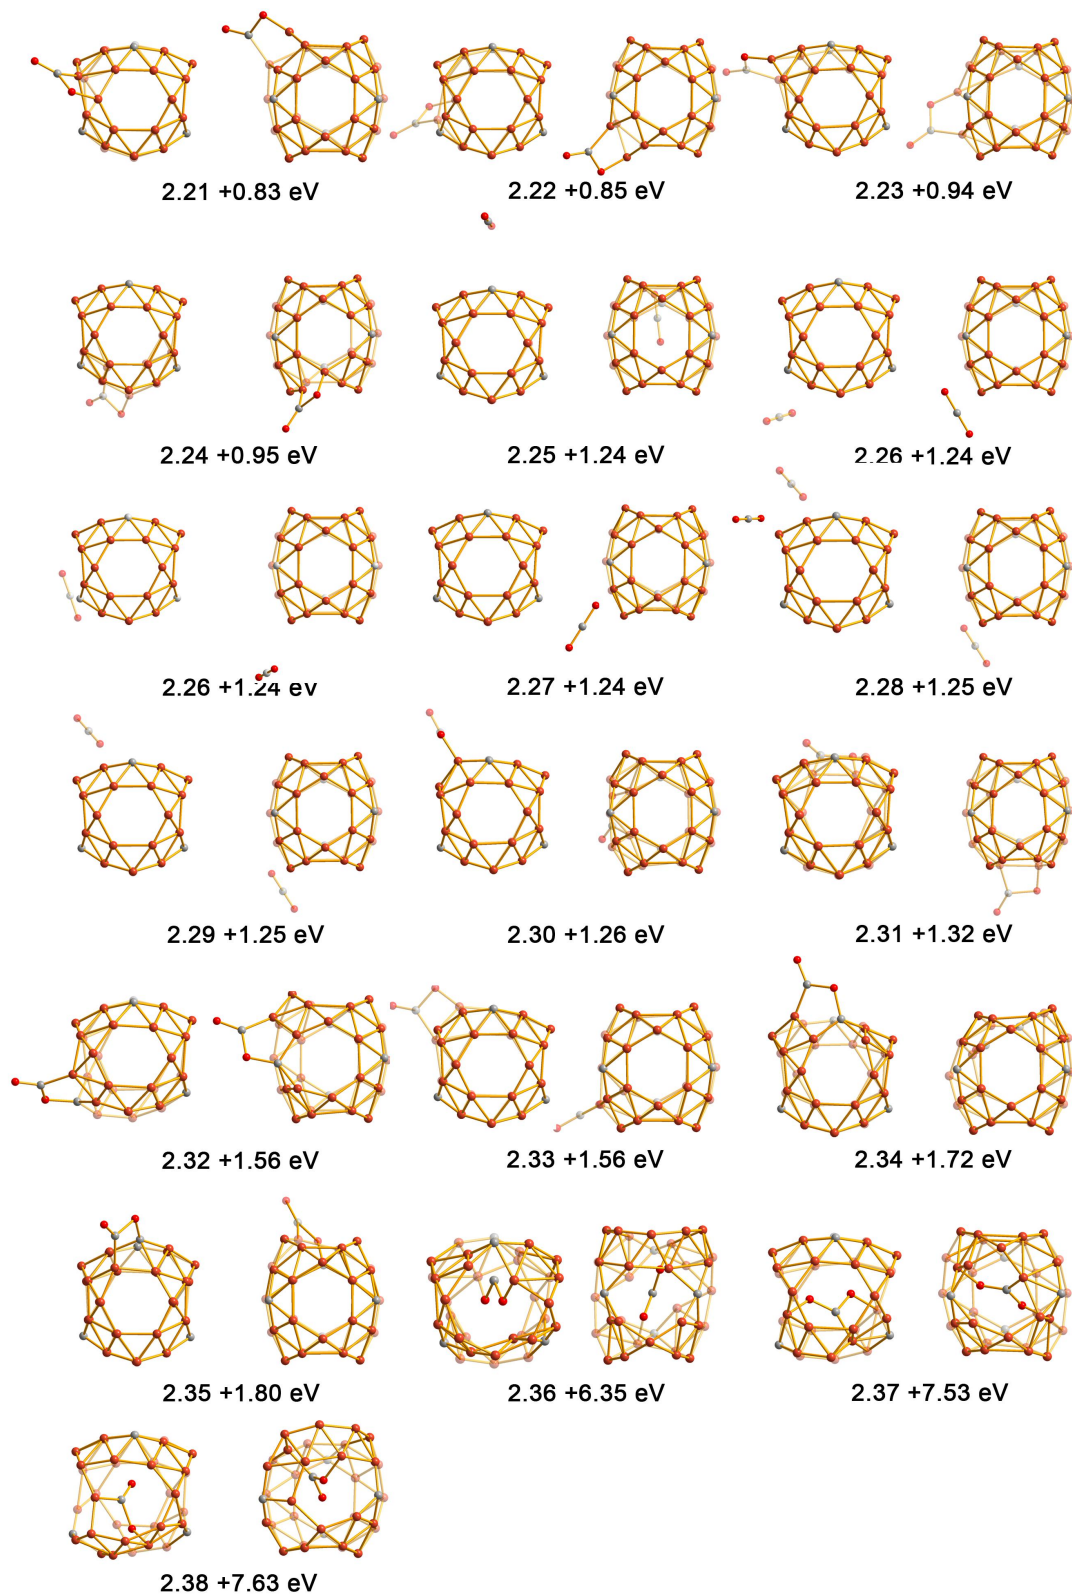

**Fig. S4** Low-lying isomers of M-doped  $C_4B_{32}$  fullerenes (M=Li, Na, K, Rb, Cs, Be, Mg, Ca, Sr, Ba, Sc, Y, Ti) with their relative energies indicated in eV.

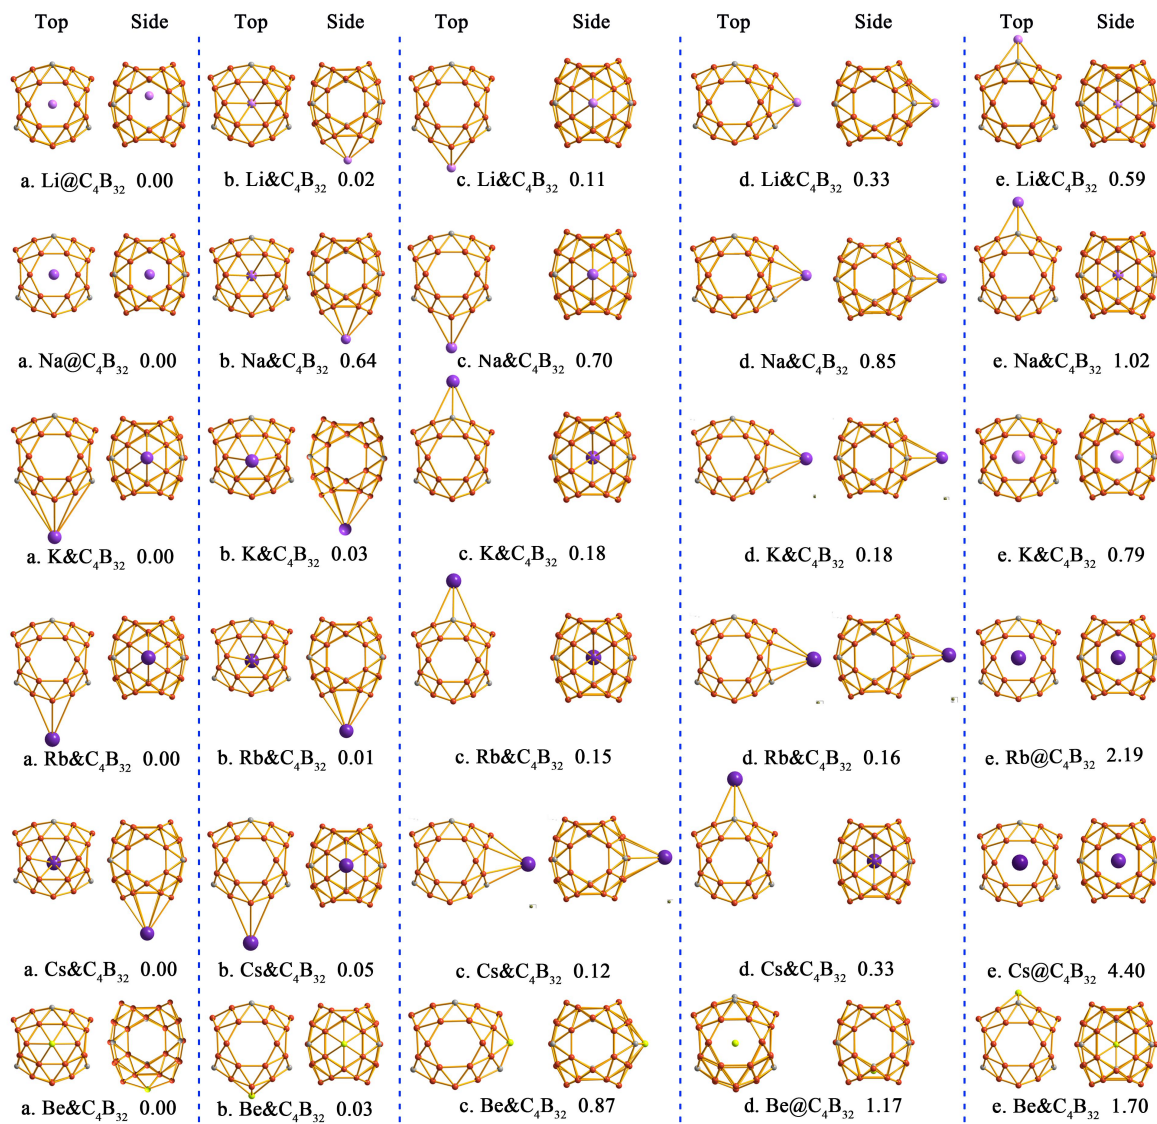

(Fig. S4 Continued)

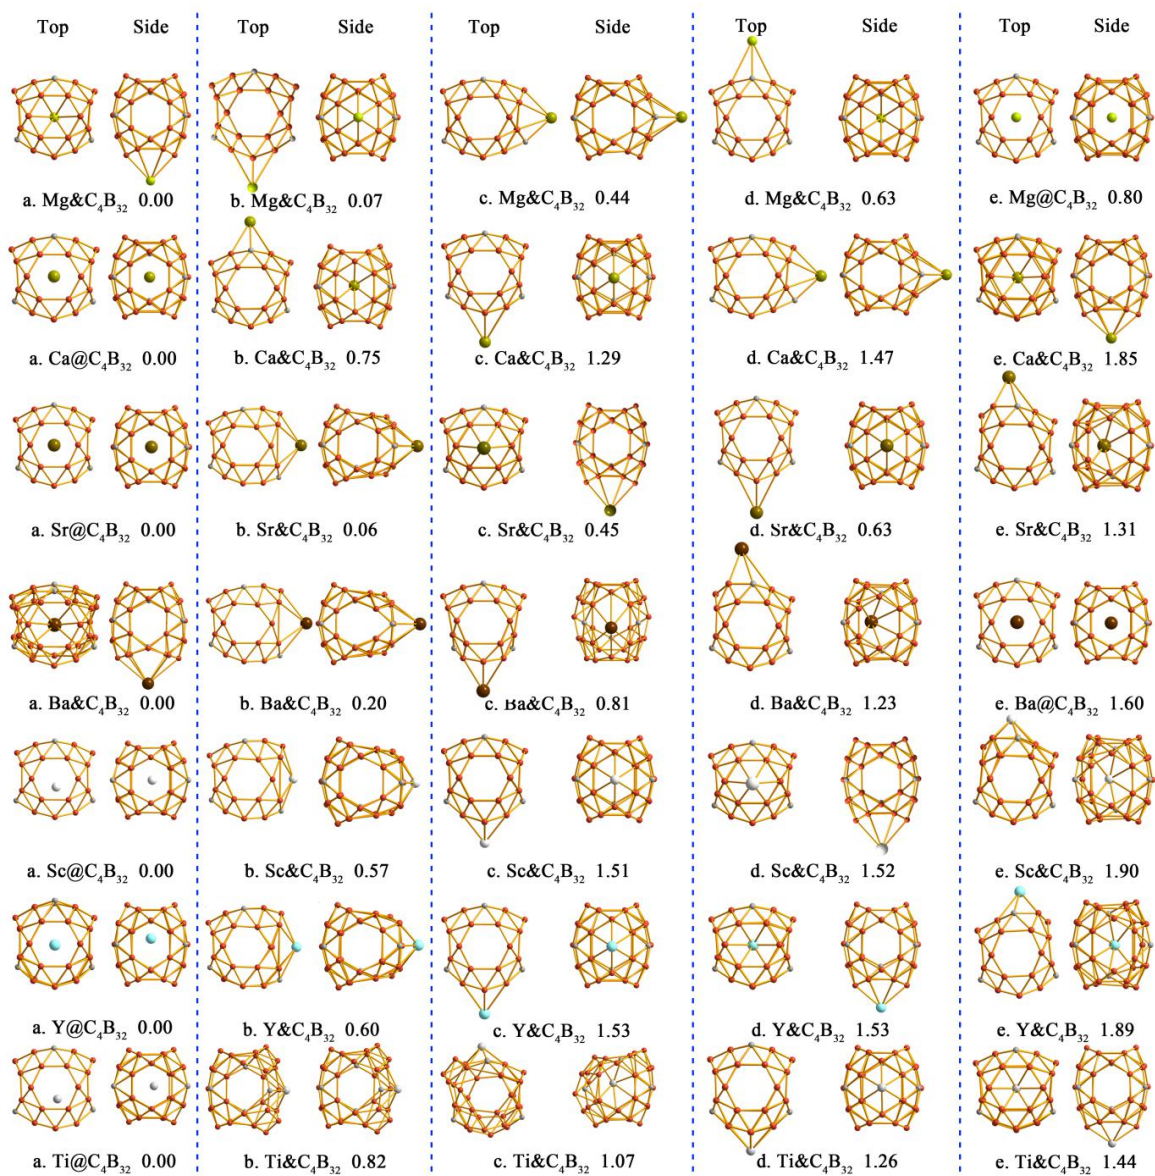

**Table S1.** Optimized coordinates of the most stable structures of  $C_4B_{32}$  and  $CO_2$ & $C_4B_{32}$  at the PBE0/6-311+G\* level.

(1)  $C_{2v} C_4B_{32}$

|   |           |           |           |
|---|-----------|-----------|-----------|
| B | -0.917877 | 2.360242  | 1.407523  |
| B | -1.320725 | 0.867368  | -2.206387 |
| B | -1.314134 | -0.910803 | 2.247994  |
| B | -1.320725 | -0.867368 | -2.206387 |
| B | -0.881595 | 2.282943  | -1.331580 |
| B | -0.917877 | -2.360242 | 1.407523  |
| B | -0.881595 | -2.282943 | -1.331580 |
| B | -2.304376 | -1.433468 | -0.916831 |
| B | -1.679587 | 2.675186  | 0.009580  |
| B | -1.314134 | 0.910803  | 2.247994  |
| B | -2.177095 | -1.323380 | 0.824561  |
| B | -2.304376 | 1.433468  | -0.916831 |
| B | -2.177095 | 1.323380  | 0.824561  |
| B | 0.917877  | -2.360242 | 1.407523  |
| B | 1.320725  | -0.867368 | -2.206387 |
| B | 1.314134  | 0.910803  | 2.247994  |
| B | 1.320725  | 0.867368  | -2.206387 |
| B | 0.881595  | -2.282943 | -1.331580 |
| B | 0.917877  | 2.360242  | 1.407523  |
| B | 0.881595  | 2.282943  | -1.331580 |
| B | 2.304376  | 1.433468  | -0.916831 |
| B | 1.314134  | -0.910803 | 2.247994  |
| B | 2.177095  | 1.323380  | 0.824561  |
| B | 2.304376  | -1.433468 | -0.916831 |
| B | 2.177095  | -1.323380 | 0.824561  |
| B | -1.679587 | -2.675186 | 0.009580  |
| B | 1.679587  | -2.675186 | 0.009580  |
| B | 0.000000  | 1.728626  | 2.645864  |
| B | 0.000000  | -1.728626 | 2.645864  |
| B | 1.679587  | 2.675186  | 0.009580  |
| B | 2.601689  | 0.000000  | -1.641325 |
| B | -2.601689 | 0.000000  | -1.641325 |
| C | 0.000000  | 1.596416  | -2.445714 |
| C | 0.000000  | -1.596416 | -2.445714 |
| C | 2.383657  | 0.000000  | 1.550498  |
| C | -2.383657 | 0.000000  | 1.550498  |



(2) C<sub>1</sub> CO<sub>2</sub>&C<sub>4</sub>B<sub>32</sub>

|   |           |           |           |
|---|-----------|-----------|-----------|
| B | 1.165649  | -1.797125 | 1.522959  |
| B | -0.237964 | -1.813763 | -1.903550 |
| B | 1.832074  | 2.142708  | 0.940988  |
| B | -0.344870 | -0.246050 | -2.573311 |
| B | -0.164528 | -2.896590 | -0.528778 |
| B | 0.720085  | 2.777334  | -0.171113 |
| B | -0.479864 | 1.455353  | -2.373919 |
| B | 1.044397  | 0.690133  | -2.094456 |
| B | 1.192297  | -2.905041 | 0.304414  |
| B | 1.808627  | -0.288651 | 1.381388  |
| B | 1.649070  | 1.418937  | -0.631818 |
| B | 1.232852  | -2.098853 | -1.116773 |
| B | 2.292493  | -1.612781 | 0.219794  |
| B | -0.919889 | 2.886324  | 0.599546  |
| B | -2.711778 | 0.078430  | -1.570680 |
| B | -0.585236 | 0.218219  | 2.562616  |
| B | -2.600184 | -1.510603 | -0.860032 |
| B | -2.018839 | 1.667952  | -1.583795 |
| B | -0.536751 | -1.493241 | 2.355241  |
| B | -1.745373 | -2.495271 | 0.260054  |
| B | -2.907259 | -1.383091 | 0.829181  |
| B | -0.752871 | 1.898546  | 2.005191  |
| B | -2.039260 | -0.605762 | 2.145855  |
| B | -3.082234 | 1.229096  | -0.334387 |
| B | -2.155524 | 1.777944  | 1.033341  |
| B | 0.717846  | 2.282819  | -1.713442 |
| B | -2.247731 | 2.672308  | -0.345986 |
| B | 0.797601  | -0.566054 | 2.568979  |
| B | 0.495772  | 2.815560  | 1.490765  |
| B | -1.875719 | -2.223085 | 1.832767  |
| B | -3.565693 | -0.331690 | -0.225726 |
| B | 1.120656  | -0.925822 | -2.211606 |
| C | -1.482967 | -2.456182 | -1.283707 |
| C | -1.687106 | 0.496452  | -2.621486 |
| C | -1.957072 | 0.902583  | 2.272715  |
| C | 2.527330  | 0.816184  | 0.560934  |
| C | 3.796042  | 0.174784  | 0.041866  |
| O | 3.588122  | -1.166270 | -0.145293 |
| O | 4.828550  | 0.704535  | -0.216014 |
